# Supplementary material for: Interactions of Pt nanoparticles with molecular components in polymer electrolyte membrane fuel cells: multi-scale modeling approach
Source: Royal Society of Chemistry journal article supplement (doi:10.1039/c6ra09274h), 2016-01-01
Supplement: c6ra09274h1.pdf [file c6ra09274h1.pdf]

## **Interactions of Pt nanoparticle with molecular components in polymer electrolyte membrane fuel cells: Multi-scale modeling approach**

Giuseppe F. Brunello,<sup>a</sup> Ji Hye Lee,<sup>b</sup> Seung Geol Lee,<sup>\*b</sup> Ji Il Choi,<sup>a</sup> David Harvey<sup>c</sup> and Seung Soon Jang<sup>\*a,d,e</sup>

<sup>a</sup> Computational NanoBio Technology Laboratory, School of Materials Science and Engineering, Georgia Institute of Technology, 771 Ferst Drive NW, Atlanta, GA 30332-0245, USA

<sup>b</sup> Department of Organic Material Science and Engineering, Pusan National University, 2, Busandaehak-ro 63beon gil, Geumjeong-gu, Busan 46241, Republic of Korea

<sup>c</sup> Ballard Power Systems, 9000 Glenlyon Parkway, Burnaby, BC V5J 5J8, Canada

<sup>d</sup> Institute for Electronics and Nanotechnology, Georgia Institute of Technology, Atlanta, GA, USA

<sup>e</sup> Parker H. Petit Institute for Bioengineering and Bioscience, Georgia Institute of Technology, Atlanta, GA, USA

\* To whom correspondence should be addressed.  
[seunggeol.lee@pusan.ac.kr](mailto:seunggeol.lee@pusan.ac.kr) (S.G. Lee),  
Phone) +82-51-510-2412, Fax) +82-51-512-8175,  
[SeungSoon.Jang@mse.gatech.edu](mailto:SeungSoon.Jang@mse.gatech.edu) (S.S. Jang),  
Phone) +1-404-385-3356, Fax) +1-404-894-9140

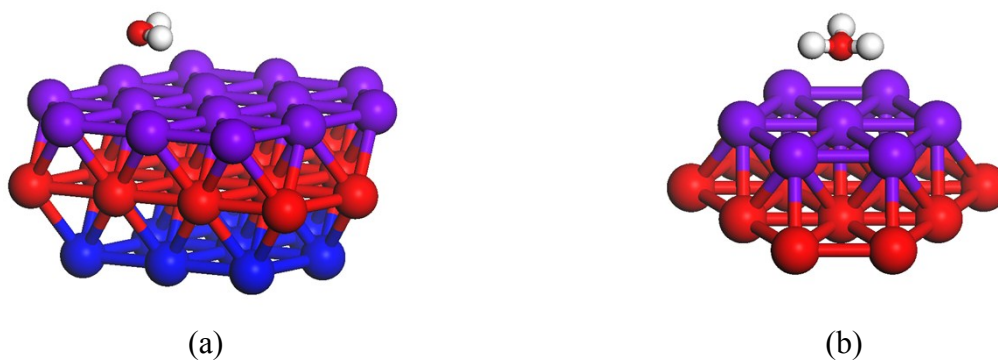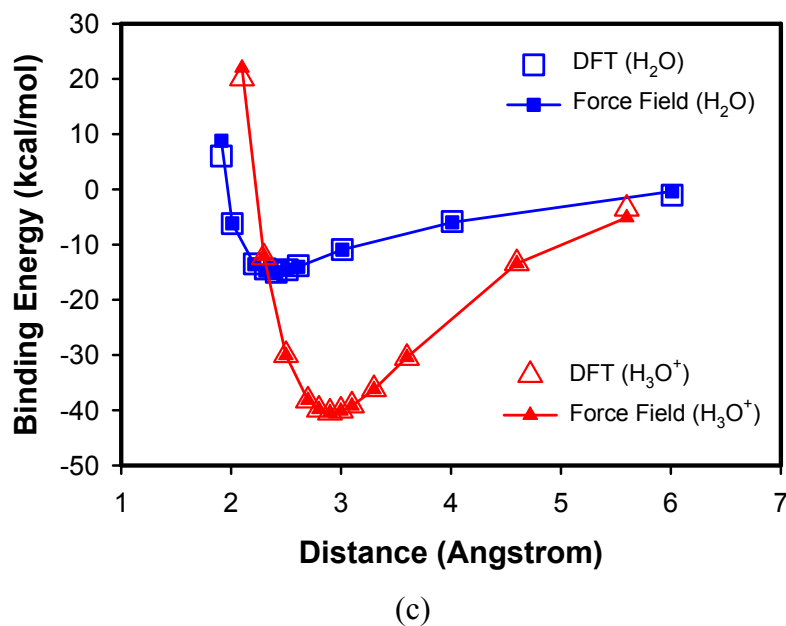

**Figure S1.** Adsorptive binding energy of H<sub>2</sub>O (water) and H<sub>3</sub>O<sup>+</sup>(hydronium) molecule on Pt (111) surface: (a) optimized geometry of H<sub>2</sub>O-Pt<sub>14+13-8</sub>; (b) optimized geometry of H<sub>3</sub>O<sup>+</sup>-Pt<sub>12-7</sub>; (c) change of binding energy of H<sub>2</sub>O and H<sub>3</sub>O<sup>+</sup> on Pt (111) surface as a function of distance. For DFT calculations, M06 functional is used with LACVP\*\* basis set. For force field calculations, Morse potential function is used with newly optimized off-diagonal van der Waals parameters.

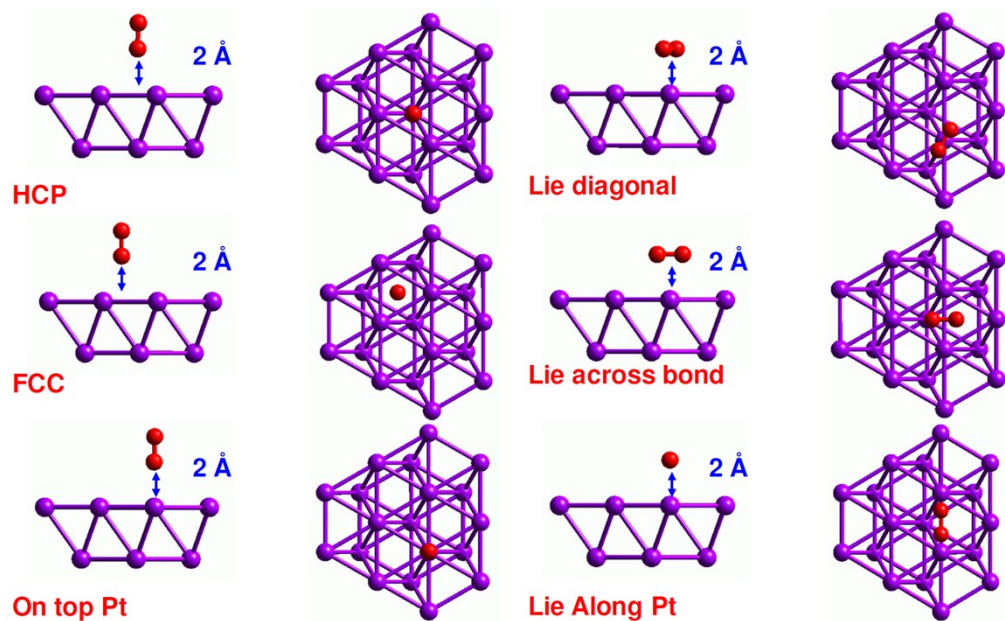

**Figure S2.** Side and top views of the six initial configurations before geometrically optimizing molecular oxygen on the Pt surface.

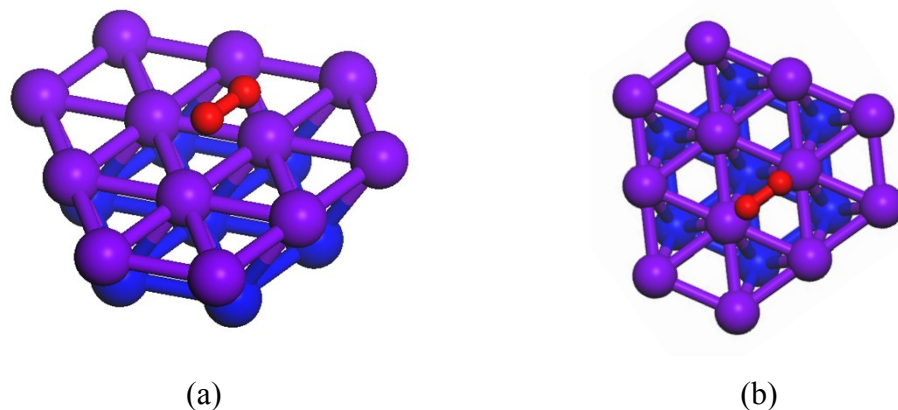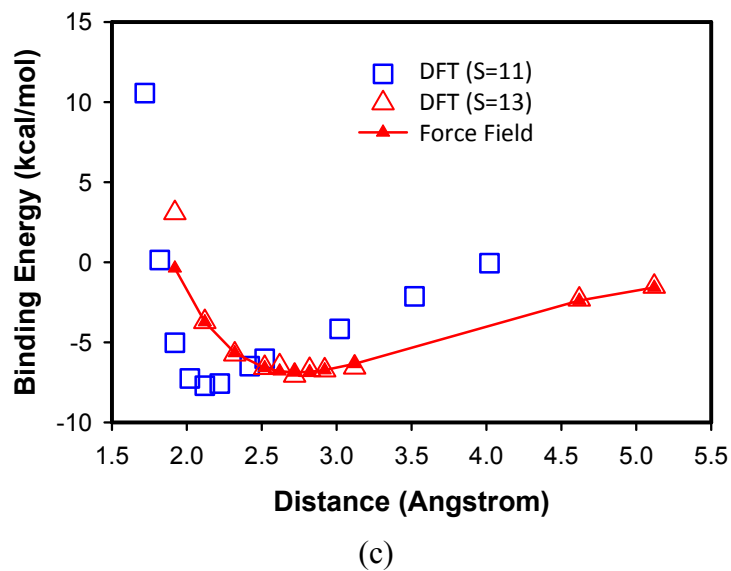

**Figure S3.** Adsorptive binding energy of  $O_2$  (oxygen) molecule on Pt (111) surface: (a) side view of optimized geometry of  $O_2$ -Pt<sub>14-13-8</sub>; (b) top view of optimized geometry; (c) change of binding energy of  $O_2$  on Pt (111) surface as a function of distance. For DFT calculations, M06 functional is used with LACVP\*\* basis set. For force field calculations, Morse potential function is used with newly optimized off-diagonal van der Waals parameters.

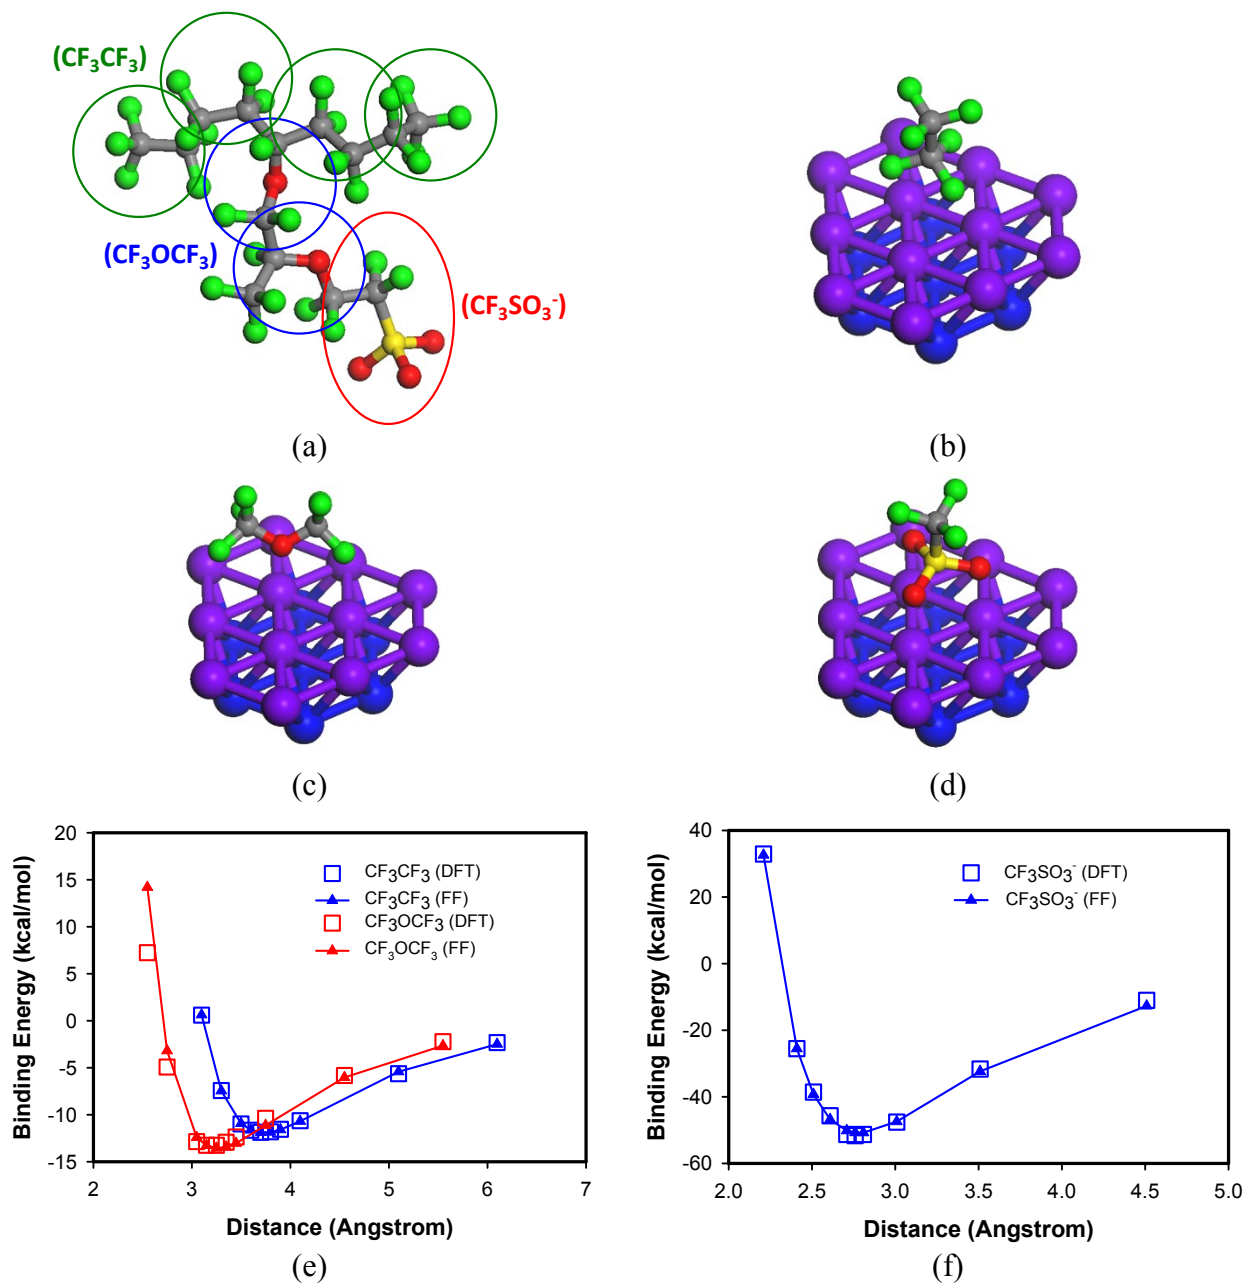

**Figure S4.** Adsorptive binding energy of fragments of polymer electrolyte (Nafion) on Pt (111) surface: (a) fragments of Nafion; (b) optimized geometry of  $CF_3CF_3$ -Pt<sub>12-7</sub>; (c) optimized geometry of  $CF_3OCF_3$ -Pt<sub>12-7</sub>; (d) optimized geometry of  $CF_3SO_3^-$ -Pt<sub>12-7</sub>; (e) change of binding energy for  $CF_3CF_3$ -Pt<sub>12-7</sub> and  $CF_3OCF_3$ -Pt<sub>12-7</sub>; (f) change of binding energy for  $CF_3SO_3^-$ -Pt<sub>12-7</sub>. For DFT calculations, M06 functional is used with LACVP\*\* basis set. For force field calculations, Morse potential function is used with newly optimized off-diagonal van der Waals parameters.

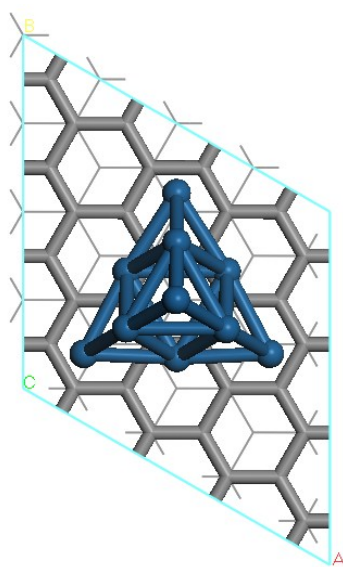

(a)

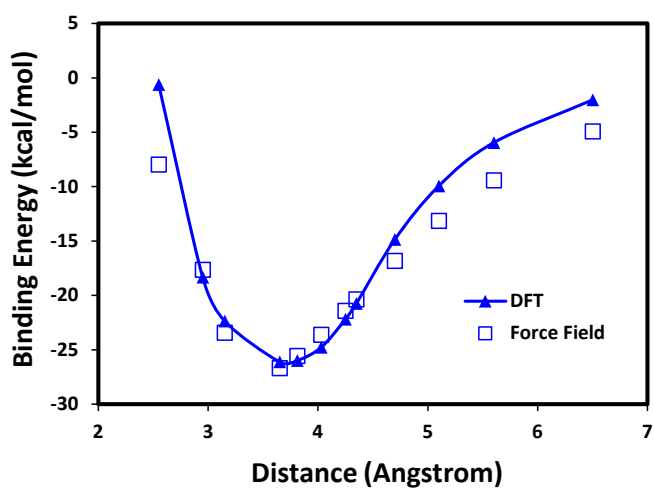

(b)

**Figure S5.** Adsorptive binding energy of Pt<sub>6-3-1</sub> cluster model on graphite surface: (a) optimized structure of Pt<sub>6-3-1</sub> on graphite; (b) change of binding energy of Pt<sub>6-3-1</sub> on graphite surface as a function of distance. For DFT calculations, PBE-D3 functional is used with DNP basis set. For force field calculations, Morse potential function is used with newly optimized off-diagonal van der Waals parameters.
